# Supplementary material
Source: PubMed Central journal article supplement (PMC5911707)
Supplement: Supp_Appendix1.pdf [file Supp_Appendix1.pdf]

## Supplementary Appendix

### S1. Using frequency matching to assign index dates for non-users

We calculated the percentages of intervals (in days) which fell into groups of 1-399, 400-799, 800-1199, 1200-1599, 1600-1999, 2000-2399, 2400-2799, 2800-3199, 3200-3599, 3600-3999 and >4000 for stimulant users. Then we grouped unordered non-users in the same way as stimulant users regarding the intervals. After grouping, the non-users and stimulant users had the same frequency distribution. Lastly, we randomly assigned a number (in days) within that group for every non-user as the index date. The purpose of frequency matching was to designate index dates for non-users and to make sure there was no systematic difference regarding the starting time of follow-up between stimulant users and non-users. Because the purpose of matching was not to control for confounding, we did not match on other variables.

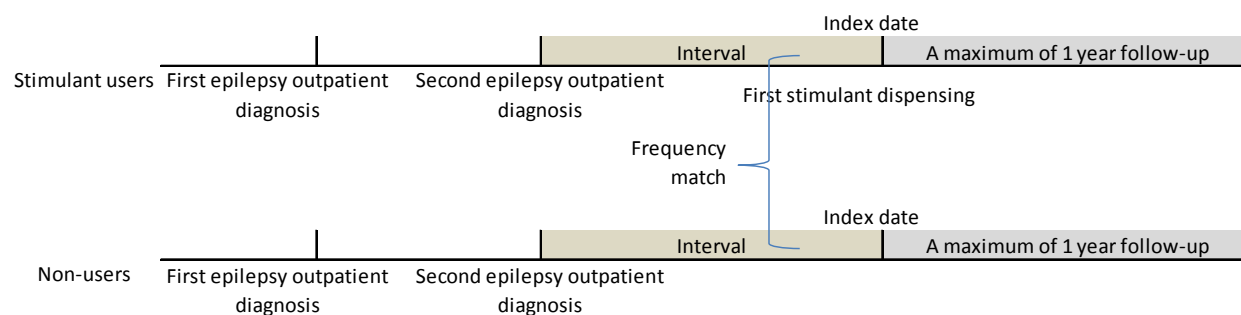

Fig The establishment of the study cohort
