# Supplementary material
Source: PubMed Central journal article supplement (PMC5911707)
Supplement: Supp_Appendix2.pdf [file Supp_Appendix2.pdf]

**S2. The measurement of excluded conditions and covariates (epilepsy subtypes, severity and comorbidities)**

| <b>Disorders</b>                            |                                                        | <b>ICD-9-CM codes</b>                                                                                                        | <b>Measurement</b>                                                                                                                         |
|---------------------------------------------|--------------------------------------------------------|------------------------------------------------------------------------------------------------------------------------------|--------------------------------------------------------------------------------------------------------------------------------------------|
| Epilepsy                                    | Generalized nonconvulsive epilepsy or petit mal status | 345.0x, 345.2x                                                                                                               | The closest epilepsy in- or outpatient diagnosis before index date. Severity: 0: no mention of intractable; 1: intractable; 9: unspecified |
|                                             | Generalized convulsive epilepsy or grand mal status    | 345.1x, 345.3x                                                                                                               |                                                                                                                                            |
|                                             | Focal epilepsy                                         | 345.4x and 345.5x                                                                                                            |                                                                                                                                            |
|                                             | Other types or unclassified epilepsy                   | 345.6x, 345.7x, 345.8x and 345.9x                                                                                            |                                                                                                                                            |
| Cerebral palsy                              |                                                        | 343.xx                                                                                                                       | Any in- or outpatient claim during the 6-month baseline before index date                                                                  |
| Congenital nervous system anomalies         |                                                        | 740.xx-742.xx                                                                                                                | Any in- or outpatient claim during the 6-month baseline before index date                                                                  |
| Autistic Spectrum Disorder, ASD             |                                                        | 299.0x, 299.8x or 299.9x                                                                                                     | Any in- or outpatient claim during the 6-month baseline before index date                                                                  |
| Brain tumor                                 |                                                        | 191.xx or 239.6                                                                                                              | Any in- or outpatient claim during the 6-month baseline before index date                                                                  |
| Intellectual disabilities                   |                                                        | 317.xx, 318.xx and 319.xx                                                                                                    | Any in- or outpatient claim during the 6-month baseline before index date                                                                  |
| Head trauma                                 |                                                        | 959.01                                                                                                                       | Any in- or outpatient claim during the 6-month baseline before index date                                                                  |
| CNS infection                               |                                                        | 013.xx, 036.xx, 046.xx-049.xx, 052.0, 053.0, 054.3, 055.0, 056.0, 062.xx-064.xx, 072.1, 072.2, 094.xx, 320.xx, 321.xx-323.xx | Any in- or outpatient claim during the 6-month baseline before index date                                                                  |
| Schizophrenia and other psychotic disorders |                                                        | 295.xx, 297.xx, and 298.xx                                                                                                   | Any in- or outpatient claim during the 6-month baseline before index date                                                                  |
| ADHD or adjustment disorders                |                                                        | 314, 314.0, 314.00, 314.01, 314.9, 309-309.20, 309.22-309.80, 309.82-309.99, and 313.89                                      | Any in- or outpatient claim during the 6-month baseline before index date                                                                  |
| ODD/CD                                      |                                                        | 312-312.29, 312.4x-312.9x, 312.30,                                                                                           | Any in- or outpatient claim during the                                                                                                     |

|                           |                                                                                                                                                                                                                                                                                                                                                                                                                                                                                                                                                                                                                  |                                                                                                                                                                                     |
|---------------------------|------------------------------------------------------------------------------------------------------------------------------------------------------------------------------------------------------------------------------------------------------------------------------------------------------------------------------------------------------------------------------------------------------------------------------------------------------------------------------------------------------------------------------------------------------------------------------------------------------------------|-------------------------------------------------------------------------------------------------------------------------------------------------------------------------------------|
|                           | 312.34, 312.35, 313, 313.8, 313.81 and 313.9x                                                                                                                                                                                                                                                                                                                                                                                                                                                                                                                                                                    | 6-month baseline before index date                                                                                                                                                  |
| Anxiety                   | 300.0–300.09, 300.2–300.29, 300.3, 309.21, 309.81, 313.0, 313.2x, 308.0, 308.2x-308.9x                                                                                                                                                                                                                                                                                                                                                                                                                                                                                                                           | Any in- or outpatient claim during the 6-month baseline before index date                                                                                                           |
| Depression                | 296.2x, 296.3x, 296.82, 300.4 and 311                                                                                                                                                                                                                                                                                                                                                                                                                                                                                                                                                                            | Any in- or outpatient claim during the 6-month baseline before index date                                                                                                           |
| Bipolar disorder          | 296.0–296.19, 296.4–296.81, 296.83-296.99, and 301.13                                                                                                                                                                                                                                                                                                                                                                                                                                                                                                                                                            | Any in- or outpatient claim during the 6-month baseline before index date                                                                                                           |
| Sleep disorder            | 307.4x, 347.xx or 780.5x                                                                                                                                                                                                                                                                                                                                                                                                                                                                                                                                                                                         | Any in- or outpatient claim during the 6-month baseline before index date                                                                                                           |
| Substance abuse disorders | ICD-9-CM codes: 291.xx, 292.xx, 303.xx, 304.xx, 305.xx, with NDC codes: 04563330, 51285275, 05550902, 52152105, 18539, 4061170, 16590897, 1672981, 47335326, 60793430, 60793431, 60793433, 60793434, 60793435, 60793437, 63459300, 65757300, 65757301, 51285523, 51285524, 64980171, 64980172, 65473706 124961310, 124961278, 124961202, 124961208, 548685707, 548685750, 636294028, 636294034 10019315, 10019311, 11098311 63481365, 63481368, 63481359, 04091212, 04091215, 04091219, 63481358, 634813771, 52584469, 52584782, 16590556, 63739463, 548682062, 548686259, 60429570, 68387531, 5481469, 5483369, | Any in- or outpatient claim, or pharmacy claim (Campral, Naltrexone, Vivitrol, Disulfiram, Subutex, Suboxone, Nalmefene and Naloxone) during the 6-month baseline before index date |

|  |                                                    |  |
|--|----------------------------------------------------|--|
|  | 43063142, 43386680, 52584212,<br>52584215, 4091782 |  |
|--|----------------------------------------------------|--|
