# Supplementary material
Source: PubMed Central journal article supplement (PMC5911707)
Supplement: Supp_Appendix3.pdf [file Supp_Appendix3.pdf]

### S3. The measurement of covariates (Drug-related)

| Covariates                            | Measurement                                                                                                                                                                                                                                                                                                       |
|---------------------------------------|-------------------------------------------------------------------------------------------------------------------------------------------------------------------------------------------------------------------------------------------------------------------------------------------------------------------|
| Number of AEDs                        | The number of unique AEDs used during baseline                                                                                                                                                                                                                                                                    |
| AED medication possession ratio (MPR) | MPR was defined as the percentage of days in the 120-day period before index date covered by any antiepileptic drugs. We used a 120-day period instead of a 180-day period to measure MPR because some time was needed to capture prescriptions filled before the measurement period to calculate MPR accurately. |
| AEDs                                  | At least one prescription of a specific AED during baseline, measured by NDC codes. The AEDs include: carbamazepine, clonazepam, diazepam, valproic acid, ethosuximide, gabapentin, lamotrigine, levetiracetam, lorazepam, oxcarbazepine, phenobarbital, phenytoin, topiramate, and zonisamide                    |
| SSRIs                                 | At least one prescription of an SSRI filled during baseline                                                                                                                                                                                                                                                       |
| non-SSRIs antidepressants             | At least one prescription of a non-SSRI antidepressant filled during baseline                                                                                                                                                                                                                                     |
| Atypical antipsychotics (AAPs)        | At least one prescription of an atypical antipsychotic filled during baseline                                                                                                                                                                                                                                     |
| Non-AAP antipsychotics                | At least one prescription of a non-AAP antipsychotic filled during baseline                                                                                                                                                                                                                                       |
| Amoxicillin                           | At least one prescription of amoxicillin filled during baseline                                                                                                                                                                                                                                                   |
| Ciprofloxacin                         | At least one prescription of ciprofloxacin filled during baseline                                                                                                                                                                                                                                                 |
| Desmopressin                          | At least one prescription of desmopressin filled during baseline                                                                                                                                                                                                                                                  |
| Ofloxacin                             | At least one prescription of ofloxacin filled during baseline                                                                                                                                                                                                                                                     |
