# Supplementary material
Source: PubMed Central journal article supplement (PMC5911707)
Supplement: Supp_Appendix5.pdf [file Supp_Appendix5.pdf]

### S5. Parameter estimates from Cox model without any interaction terms

Of note, we only measured AED use during baseline while did not measure or adjust AED use during follow-up because AED use might be an intermediate variable on a causal pathway from exposure to outcome. Adjusting for an intermediate variable biases the results toward the null.<sup>2</sup> Also, the hazard ratios for the confounders may provide some hint for the identification of high-risk patients for seizure-related hospitalization; however, it should be pointed out that the model did not intend to estimate the effects of these factors and control for confounding for them. The hazard ratios cannot be interpreted as the association between these factors and the outcome.

| Drug exposure and covariates              | Parameter estimate | Standard Error | Chi-Square | p-value | Hazard Ratio | 95% CI |      |
|-------------------------------------------|--------------------|----------------|------------|---------|--------------|--------|------|
| <b>Current exposure</b>                   | -0.056             | 0.070          | 0.634      | 0.43    | 0.95         | 0.83   | 1.09 |
| <b>Former exposure</b>                    | -0.010             | 0.074          | 0.019      | 0.89    | 0.99         | 0.86   | 1.15 |
| <b>Gender</b>                             |                    |                |            |         |              |        |      |
| Male                                      | 0.037              | 0.041          | 0.812      | 0.37    | 1.04         | 0.96   | 1.13 |
| <b>Race</b>                               |                    |                |            |         |              |        |      |
| Black                                     | 0.276              | 0.052          | 27.652     | <.0001  | 1.32         | 1.19   | 1.46 |
| American Indian or Alaskan Native         | -0.429             | 0.321          | 1.786      | 0.18    | 0.65         | 0.35   | 1.22 |
| Asian                                     | -0.006             | 0.197          | 0.001      | 0.97    | 0.99         | 0.68   | 1.46 |
| Hispanic or Latino                        | -0.060             | 0.072          | 0.695      | 0.40    | 0.94         | 0.82   | 1.08 |
| Native Hawaiian or other pacific islander | 0.792              | 0.246          | 10.370     | 0.00    | 2.21         | 1.36   | 3.57 |
| Hispanic or latino and one or more races  | 0.376              | 0.131          | 8.287      | 0.00    | 1.46         | 1.13   | 1.88 |
| More than one race                        | 0.097              | 0.451          | 0.046      | 0.83    | 1.10         | 0.46   | 2.67 |
| Unknown                                   | 0.002              | 0.080          | 0.000      | 0.98    | 1.00         | 0.86   | 1.17 |
| <b>Age</b>                                |                    |                |            |         |              |        |      |
| age 6-9                                   | -0.347             | 0.058          | 35.735     | <.0001  | 0.71         | 0.63   | 0.79 |

|                                     |        |       |         |        |      |      |      |
|-------------------------------------|--------|-------|---------|--------|------|------|------|
| age 10-14                           | -0.774 | 0.063 | 151.534 | <.0001 | 0.46 | 0.41 | 0.52 |
| age 14-18                           | -0.854 | 0.071 | 146.389 | <.0001 | 0.43 | 0.37 | 0.49 |
| <b>Epilepsy type</b>                |        |       |         |        |      |      |      |
| Generalized convulsive epilepsy     | 0.105  | 0.081 | 1.681   | 0.19   | 1.11 | 0.95 | 1.30 |
| Focal epilepsy                      | 0.031  | 0.081 | 0.150   | 0.70   | 1.03 | 0.88 | 1.21 |
| Other types of epilepsy             | 0.127  | 0.078 | 2.635   | 0.10   | 1.14 | 0.97 | 1.32 |
| <b>Epilepsy severity</b>            |        |       |         |        |      |      |      |
| Intractable epilepsy                | 0.296  | 0.049 | 37.212  | <.0001 | 1.34 | 1.22 | 1.48 |
| Unknown severity epilepsy           | 0.059  | 0.074 | 0.638   | 0.42   | 1.06 | 0.92 | 1.23 |
| <b>Comorbidities</b>                |        |       |         |        |      |      |      |
| Cerebral palsy                      | 0.022  | 0.052 | 0.183   | 0.67   | 1.02 | 0.92 | 1.13 |
| Congenital nervous system anomalies | 0.236  | 0.050 | 22.504  | <.0001 | 1.27 | 1.15 | 1.40 |
| Intellectual disability             | 0.279  | 0.051 | 30.375  | <.0001 | 1.32 | 1.20 | 1.46 |
| Head trauma                         | 0.538  | 0.119 | 20.441  | <.0001 | 1.71 | 1.36 | 2.16 |
| ADHD                                | -0.046 | 0.062 | 0.542   | 0.46   | 0.96 | 0.85 | 1.08 |
| Anxiety                             | 0.110  | 0.121 | 0.829   | 0.36   | 1.12 | 0.88 | 1.42 |
| Autism                              | 0.249  | 0.053 | 22.231  | <.0001 | 1.28 | 1.16 | 1.42 |
| Bipolar disorder                    | 0.169  | 0.138 | 1.496   | 0.22   | 1.19 | 0.90 | 1.55 |
| Depression                          | 0.107  | 0.129 | 0.692   | 0.41   | 1.11 | 0.87 | 1.43 |
| ODD/CD                              | -0.078 | 0.078 | 0.995   | 0.32   | 0.93 | 0.80 | 1.08 |
| Schizophrenia                       | -0.049 | 0.204 | 0.059   | 0.81   | 0.95 | 0.64 | 1.42 |
| Sleep disorder                      | 0.099  | 0.103 | 0.924   | 0.34   | 1.10 | 0.90 | 1.35 |
| <b>Medicaid eligibility</b>         |        |       |         |        |      |      |      |
| Foster care                         | -0.173 | 0.106 | 2.673   | 0.10   | 0.84 | 0.68 | 1.04 |
| Cash assistance                     | 0.436  | 0.070 | 38.432  | <.0001 | 1.55 | 1.35 | 1.78 |
| Poverty                             | 0.171  | 0.076 | 5.035   | 0.02   | 1.19 | 1.02 | 1.38 |
| Disability                          | -0.176 | 0.075 | 5.565   | 0.02   | 0.84 | 0.72 | 0.97 |
| <b>State</b>                        |        |       |         |        |      |      |      |
| AL                                  | 0.459  | 0.283 | 2.633   | 0.10   | 1.58 | 0.91 | 2.76 |
| AR                                  | -0.397 | 0.192 | 4.266   | 0.04   | 0.67 | 0.46 | 0.98 |

|                      |        |       |        |        |      |      |      |
|----------------------|--------|-------|--------|--------|------|------|------|
| CA                   | -0.271 | 0.111 | 5.966  | 0.01   | 0.76 | 0.61 | 0.95 |
| GA                   | -0.344 | 0.126 | 7.391  | 0.01   | 0.71 | 0.55 | 0.91 |
| ID                   | -0.391 | 0.237 | 2.724  | 0.10   | 0.68 | 0.43 | 1.08 |
| IL                   | -0.133 | 0.115 | 1.340  | 0.25   | 0.88 | 0.70 | 1.10 |
| IN                   | -1.048 | 0.190 | 30.442 | <.0001 | 0.35 | 0.24 | 0.51 |
| KS                   | 0.056  | 0.190 | 0.086  | 0.77   | 1.06 | 0.73 | 1.54 |
| LA                   | -0.193 | 0.118 | 2.676  | 0.10   | 0.83 | 0.66 | 1.04 |
| MA                   | 0.024  | 0.346 | 0.005  | 0.94   | 1.03 | 0.52 | 2.02 |
| MN                   | -0.116 | 0.151 | 0.596  | 0.44   | 0.89 | 0.66 | 1.20 |
| MS                   | -0.285 | 0.150 | 3.582  | 0.06   | 0.75 | 0.56 | 1.01 |
| MO                   | -0.284 | 0.159 | 3.169  | 0.08   | 0.75 | 0.55 | 1.03 |
| NJ                   | 0.629  | 0.152 | 17.117 | <.0001 | 1.88 | 1.39 | 2.53 |
| NM                   | 0.389  | 0.521 | 0.556  | 0.46   | 1.48 | 0.53 | 4.10 |
| NY                   | 0.422  | 0.110 | 14.690 | 0.00   | 1.53 | 1.23 | 1.89 |
| NC                   | -0.524 | 0.122 | 18.573 | <.0001 | 0.59 | 0.47 | 0.75 |
| OH                   | -0.133 | 0.114 | 1.366  | 0.24   | 0.88 | 0.70 | 1.09 |
| SC                   | -0.279 | 0.139 | 4.005  | 0.05   | 0.76 | 0.58 | 0.99 |
| TN                   | -0.295 | 0.192 | 2.375  | 0.12   | 0.74 | 0.51 | 1.08 |
| TX                   | -0.215 | 0.110 | 3.846  | 0.05   | 0.81 | 0.65 | 1.00 |
| VA                   | -0.464 | 0.170 | 7.504  | 0.01   | 0.63 | 0.45 | 0.88 |
| WA                   | -0.161 | 0.421 | 0.147  | 0.70   | 0.85 | 0.37 | 1.94 |
| WV                   | -0.785 | 0.195 | 16.257 | <.0001 | 0.46 | 0.31 | 0.67 |
| WI                   | -0.125 | 0.141 | 0.790  | 0.37   | 0.88 | 0.67 | 1.16 |
| <b>Calendar year</b> |        |       |        |        |      |      |      |
| 1999                 | 0.402  | 0.164 | 6.021  | 0.01   | 1.50 | 1.08 | 2.06 |
| 2000                 | 0.388  | 0.134 | 8.341  | 0.00   | 1.47 | 1.13 | 1.92 |
| 2001                 | 0.248  | 0.133 | 3.481  | 0.06   | 1.28 | 0.99 | 1.66 |
| 2002                 | 0.214  | 0.131 | 2.671  | 0.10   | 1.24 | 0.96 | 1.60 |
| 2003                 | 0.279  | 0.128 | 4.749  | 0.03   | 1.32 | 1.03 | 1.70 |
| 2004                 | 0.188  | 0.128 | 2.164  | 0.14   | 1.21 | 0.94 | 1.55 |

|                       |        |       |        |        |      |      |      |
|-----------------------|--------|-------|--------|--------|------|------|------|
| 2005                  | 0.126  | 0.129 | 0.956  | 0.33   | 1.13 | 0.88 | 1.46 |
| 2006                  | 0.102  | 0.132 | 0.598  | 0.44   | 1.11 | 0.86 | 1.43 |
| 2007                  | 0.128  | 0.134 | 0.918  | 0.34   | 1.14 | 0.88 | 1.48 |
| 2008                  | 0.044  | 0.138 | 0.100  | 0.75   | 1.05 | 0.80 | 1.37 |
| 2009                  | 0.063  | 0.137 | 0.211  | 0.65   | 1.07 | 0.81 | 1.39 |
| <b>Non-AED Drugs</b>  |        |       |        |        |      |      |      |
| amoxicillin           | 0.100  | 0.044 | 5.164  | 0.02   | 1.11 | 1.01 | 1.21 |
| ciprofloxacin         | -0.036 | 0.099 | 0.132  | 0.72   | 0.97 | 0.80 | 1.17 |
| desmopressin          | 0.131  | 0.180 | 0.530  | 0.47   | 1.14 | 0.80 | 1.62 |
| ofloxacin             | 0.301  | 0.106 | 8.104  | 0.00   | 1.35 | 1.10 | 1.66 |
| <b>Number of AEDs</b> | 0.347  | 0.039 | 80.094 | <.0001 | 1.42 | 1.31 | 1.53 |
| <b>AEDs</b>           |        |       |        |        |      |      |      |
| carbamazepine         | 0.016  | 0.067 | 0.060  | 0.81   | 1.02 | 0.89 | 1.16 |
| clonazepam            | -0.112 | 0.081 | 1.916  | 0.17   | 0.89 | 0.76 | 1.05 |
| diazepam              | -0.019 | 0.068 | 0.076  | 0.78   | 0.98 | 0.86 | 1.12 |
| divalproex            | -0.050 | 0.062 | 0.653  | 0.42   | 0.95 | 0.84 | 1.07 |
| ethosuximide          | -0.188 | 0.173 | 1.174  | 0.28   | 0.83 | 0.59 | 1.16 |
| gabapentin            | -0.078 | 0.115 | 0.456  | 0.50   | 0.93 | 0.74 | 1.16 |
| lamotrigine           | 0.121  | 0.070 | 2.990  | 0.08   | 1.13 | 0.98 | 1.29 |
| levetiracetam         | 0.286  | 0.070 | 16.593 | <.0001 | 1.33 | 1.16 | 1.53 |
| lorazepam             | -0.290 | 0.112 | 6.650  | 0.01   | 0.75 | 0.60 | 0.93 |
| oxcarbazepine         | 0.267  | 0.074 | 12.988 | 0.00   | 1.31 | 1.13 | 1.51 |
| phenobarbital         | -0.039 | 0.073 | 0.286  | 0.59   | 0.96 | 0.83 | 1.11 |
| phenytoin             | 0.241  | 0.085 | 7.960  | 0.00   | 1.27 | 1.08 | 1.50 |
| topiramate            | 0.195  | 0.065 | 8.904  | 0.00   | 1.22 | 1.07 | 1.38 |
| zonisamide            | 0.075  | 0.092 | 0.658  | 0.42   | 1.08 | 0.90 | 1.29 |
| <b>MPR</b>            |        |       |        |        |      |      |      |
| mpr = 0               | -0.699 | 0.091 | 59.524 | <.0001 | 0.50 | 0.42 | 0.59 |
| mpr (0, 80]           | -0.065 | 0.052 | 1.568  | 0.21   | 0.94 | 0.85 | 1.04 |
| <b>Psychotropics</b>  |        |       |        |        |      |      |      |

|                          |        |       |       |      |      |      |      |
|--------------------------|--------|-------|-------|------|------|------|------|
| SSRIs                    | 0.034  | 0.105 | 0.105 | 0.75 | 1.04 | 0.84 | 1.27 |
| Non-SSRI antidepressants | -0.064 | 0.114 | 0.312 | 0.58 | 0.94 | 0.75 | 1.17 |
| Atypical antipsychotics  | -0.130 | 0.078 | 2.793 | 0.09 | 0.88 | 0.75 | 1.02 |
| Other antipsychotics     | -0.472 | 0.247 | 3.655 | 0.06 | 0.62 | 0.38 | 1.01 |

1. Vittinghoff E, McCulloch CE. Relaxing the rule of ten events per variable in logistic and Cox regression. *Am J Epidemiol.* Mar 2007;165(6):710-718.
2. Schisterman EF, Cole SR, Platt RW. Overadjustment bias and unnecessary adjustment in epidemiologic studies. *Epidemiology.* Jul 2009;20(4):488-495.
